# Supplementary material for: Hybrid electrons in the trimerized GaV4O8
Source: Royal Society of Chemistry journal article supplement (doi:10.1039/d1mh00390a), 2021-01-01
Supplement: d1mh00390a2.pdf [file d1mh00390a2.pdf]

Supplementary information for:

Hybrid electrons in the trimerized GaV<sub>4</sub>O<sub>8</sub>.

Cintli Aguilar-Maldonado<sup>1</sup>, Olivier Mentré<sup>1</sup>, Alexander A. Tsirlin<sup>2</sup>, Clemens Ritter<sup>3</sup>, Aleksandr Missiul<sup>4</sup>, Francois Fauth<sup>4</sup> and Angel M. Arévalo-López<sup>1\*</sup>.

<sup>1</sup> Université Lille Nord de France, UMR 8181 CNRS, Unité de Catalyse et de Chimie du Solide (UCCS USTL), F-59655 Villeneuve d'Ascq, France.

<sup>2</sup> Experimental Physics VI, Center for Electronic Correlations and Magnetism, University of Augsburg, 86159 Augsburg, Germany

<sup>3</sup> Institut Laue-Langevin, 71 Avenue des Martyrs, Grenoble Cedex, France.

<sup>4</sup> CELLS-ALBA Synchrotron, 08290 Cerdanyola, Barcelona, Spain

## Electronic structure and magnetic interactions.

The uncorrelated electronic structure of  $\text{GaV}_4\text{O}_8$  is metallic (Fig. S1) and highlights the different nature of the V1 and V2 electrons. While the V2 states form multiple narrow bands arising from the molecular orbitals of the  $\text{V}_2\text{O}_3$  triangular units, the V1 states are found around 0 and 2 eV and show the  $t_{2g}$ - $e_g$  splitting typical of  $\text{V}^{3+}$  in the octahedral environment.

Disregarding the weak magnetic moment associated with the  $\text{V}_2\text{O}_3$  molecules, we mapped the bands in the energy range between -0.1 and +0.5 eV onto a tight-binding model containing V1  $t_{2g}$  states only. This way, we assessed magnetic interactions between the V1 spins and included the effect of the  $\text{V}_2\text{O}_3$  molecular orbitals implicitly. Hopping parameters  $t_i$  of the tight-binding model were used to estimate magnetic exchange couplings as  $J_i = 4t_i^2/U_{\text{eff}}$ , where  $U_{\text{eff}} = 4$  eV is the effective on-site Coulomb repulsion, and the contributions of the two lower-lying  $t_{2g}$  orbitals are taken together to account for the two unpaired electrons of  $\text{V}^{3+}$ . This estimate results in two exchange couplings of similar strength,  $J_1$  and  $J_2$ , that together form an hcp-network. Note that the  $J_i$  values are taken per bond and normalized to  $S = 1$  of  $\text{V}^{3+}$ .

We have also calculated the correlated electronic structure using DFT+ $U$  and stabilized an insulating solution. This method tends to localize all  $d$ -electrons and break orbital molecules regardless of their actual stability. But even such an ultimate localization leads to the same features of charge separation as found experimentally. A robust  $\text{V}^{3+}$  state is seen on the V1 site with the magnetic moment of nearly  $2 \mu_B$ , V2\_3 shows a  $\text{V}^{4+}$ -like state with the magnetic moment of about  $1 \mu_B$ , whereas V2\_1 and V2\_2 display intermediate magnetic moments that are similar in size for both atoms. A similar distribution of the magnetic moments is obtained for several types of collinear magnetic order that could be stabilized for the experimental  $Cmc2_1$  crystal structure. A representative density of states is shown in Fig. S2. Here, the V2\_3 makes a lower contribution below the Fermi level than V1. On the other hand, the contributions of V2\_1 and V2\_2 below the Fermi level are similar in size, although they show a somewhat different energy distribution.

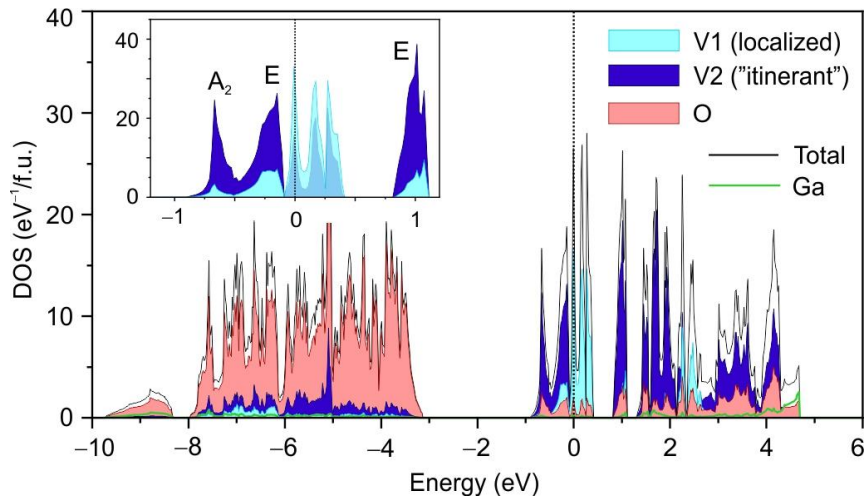

Supp. Fig 1. Uncorrelated electronic structure of  $\text{GaV}_4\text{O}_8$  showing two distinct types of  $d$ -electrons: localized electrons of V1 and “itinerant” electrons of V2 that form orbital molecules. The inset displays the peaks of the V2 DOS corresponding to the  $A_2$  and E molecular orbitals of  $\text{V}2_3$  in Fig. 1d.

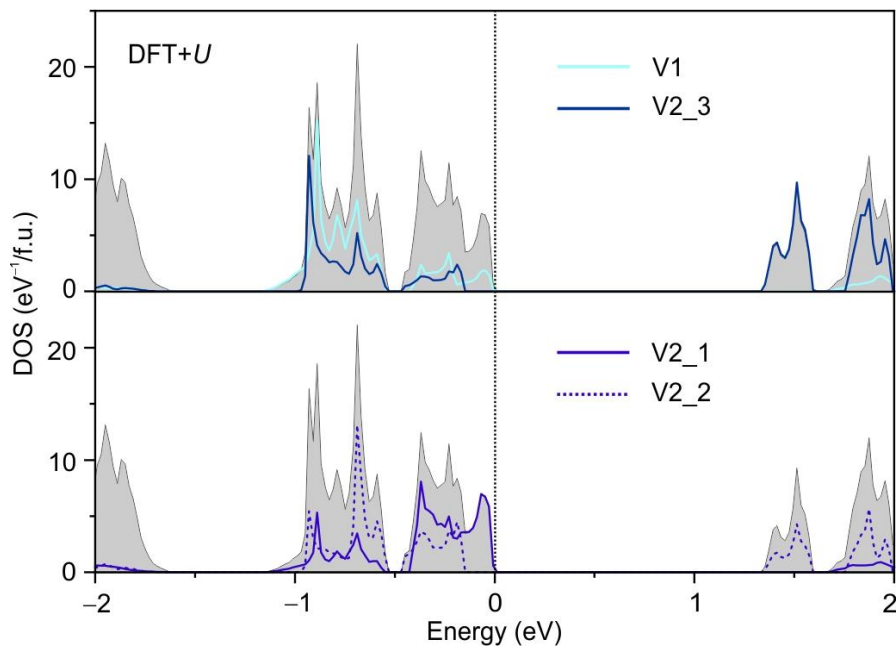

Supp. Fig 2. Electronic structure of  $\text{GaV}_4\text{O}_8$  calculated on the DFT+ $U$  level for the sample collinear magnetic structure with the V1 and V2<sub>1</sub> spins aligned parallel to each other and antiparallel to the V2<sub>2</sub> and V2<sub>3</sub> spins, respectively. Both panels show the total DOS (shaded area) as well as atomic-resolved DOS for the majority-spin direction of the respective atom. Note the difference in the number of filled states for V1 vs. V2<sub>3</sub> having different valence (upper panel) and the similarity for V2<sub>1</sub> and V2<sub>2</sub> with the similar valence (lower panel).

### Physical properties characterisation.

The temperature dependence of the magnetic susceptibility of  $\text{GaV}_4\text{O}_8$  is well described by the Curie-Weiss law above 100 K as shown by the inverse susceptibility fit in Supp. Figure 3a. The Weiss temperature of  $\theta = -28$  K indicates antiferromagnetic interactions between the unpaired spins of the vanadium atoms. The Curie constant of  $C = 1.192 \text{ emu K Oe}^{-1}\text{mol fu}^{-1}$  ( $\mu_{\text{eff}} = 1.54 \mu_{\text{B}}$  per V) is significantly reduced from the ideal 3.375 value for  $3 \times S = 1$  and  $1 \times S = \frac{1}{2}$  free moments for  $\text{GaV}_4\text{O}_8$ . However, this value approximates to 1.375 for a  $S = 1$  (from  $\text{V}1^{3+}$ ) and  $S = \frac{1}{2}$  (delocalized in the  $\text{V}2_3$  trimer) obtained from the unpaired spins.

A kink in the magnetic susceptibility occurs around  $T_S = 68$  K, and a well-defined maximum appears at  $T_N = 35$  K. Magnetisation versus field measurements at 2 K proves an antiferromagnetic transition with  $M_{9T} = 0.05 \mu_{\text{B}}/\text{V}$  (Supp. Fig S3b).

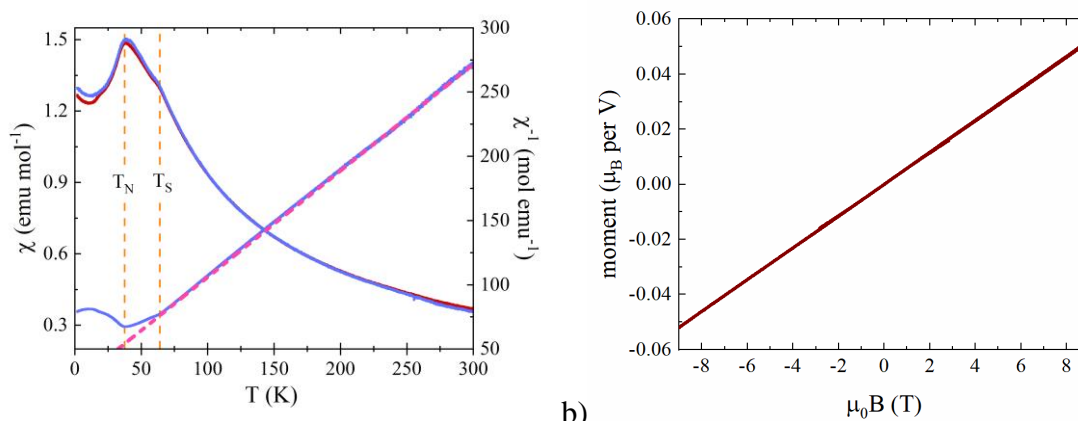

a) Supp. Fig. 3. a) Direct and inverse magnetic susceptibility curves. Vertical broken lines mark the structural transition at  $T_S = 68$  K and the antiferromagnetic transition at  $T_N = 35$  K. Dashed broken line represents the Curie-Weiss fit as discussed above. b) Magnetisation-field loop at 2 K showing a clear AFM signal.

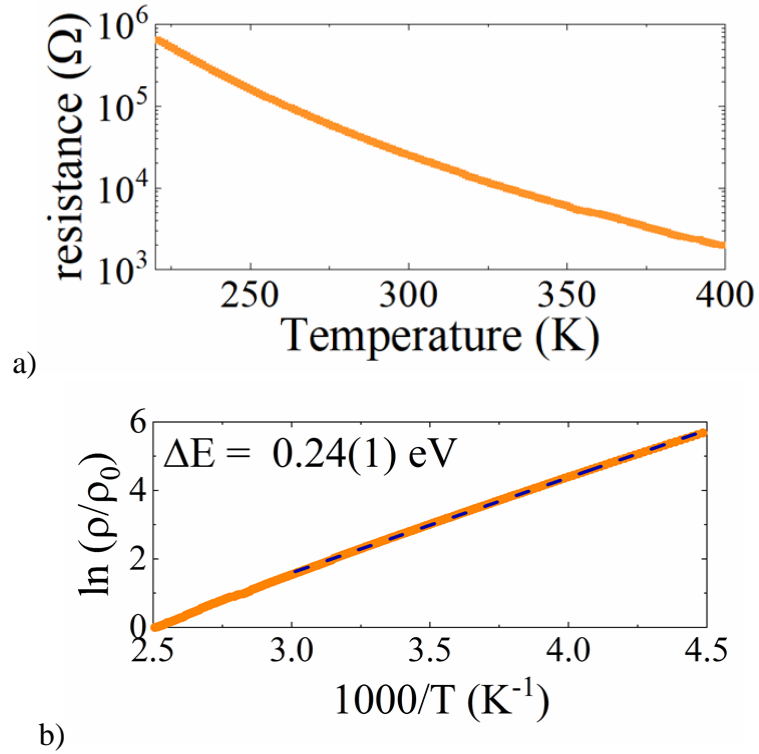

Supp. Fig 4. a) Thermal behaviour of the resistance for  $\text{GaV}_4\text{O}_8$ . Below 220 K the sample is too resistive to measure on our equipment. Arrhenius plot of the electronic resistivity with a  $\Delta E = 0.24(1) \text{ eV}$  activation energy.

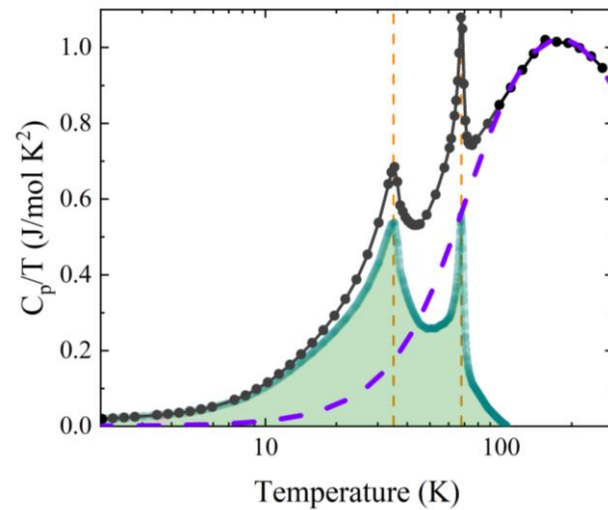

Supp. Fig 5. Heat capacity measurements for  $\text{GaV}_4\text{O}_8$ . The phonon contribution was fitted with a two terms Debye model and a negligible electronic contribution (dashed purple line). Two sharp transitions can be observed at  $T_S$  and  $T_N$ . Green area corresponds to the heat capacity after removal of the phonon contribution. Applied magnetic fields of up to  $\mu_0 H = 9 \text{ T}$  indicate no effect in the observed maxima, thus confirming the robust AFM nature of the spin ordering below  $T_N$ .

## Neutron diffraction.

Neutron diffraction was collected at D1B and D20 at the Institute Laue-Langevin, Grenoble, France. Long scans were required at D20 in order to fully resolve the magnetic diffraction as shown in Supp. Fig. 6.

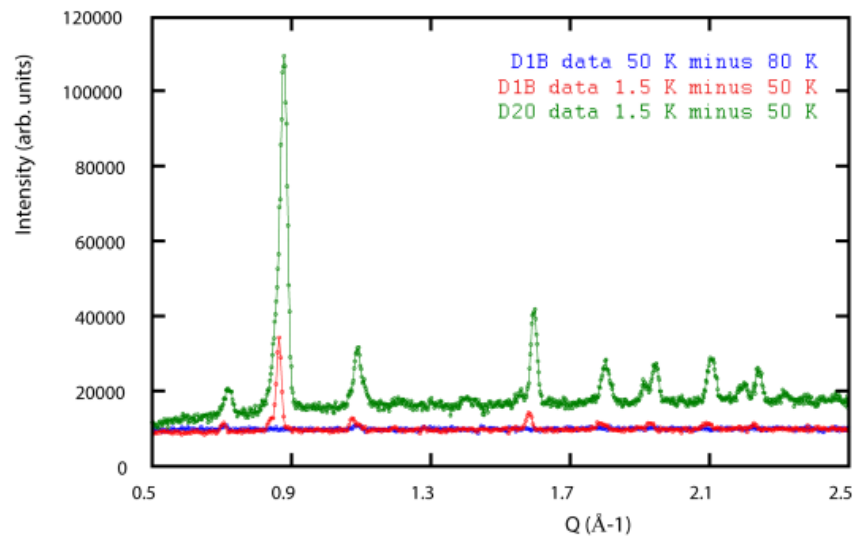

Supp. Fig. 6. Magnetic diffraction obtained from D1B and D20 experiments.

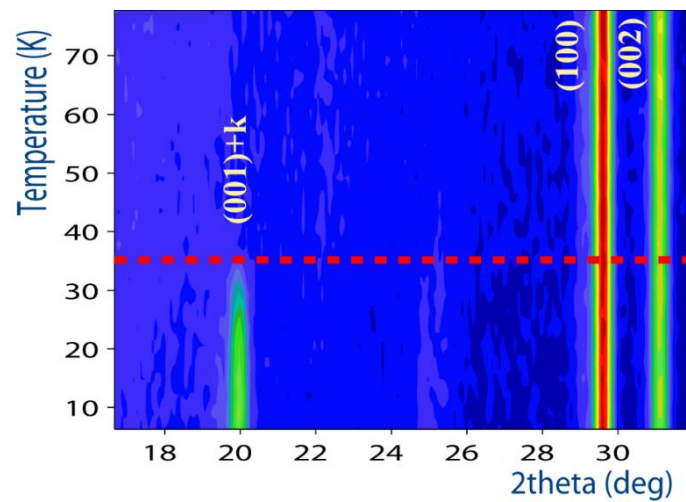

Supp. Fig. 7. D1B neutron powder thermodiffractogram where a clear magnetic intensity can be observed below  $T_N$ .

A small contribution from the  $V_3O_5$  secondary phase (<4wt%) was also observed and considered in the analysis.

Figure 3a from the main text shows the best fit to the 1.5 – 50 K difference data from D20 long scans. Attempts to constrain all three V2 moments, or to place a single magnetic moment in the centre of the  $V_2_3$  triangle by analogy to  $GaV_4S_8$  or  $LiZnMo_3O_8$  were unsuccessful.

The local moment values are well scaled by the BVS from Figure 2. They indicate charge order that can be ultimately seen as covalently bonded  $V^{3+}$  at the V2\_1 and V2\_2 sites (higher moment) and  $V^{4+}$  at the V2\_3 site (lower moment) (Fig. 3c). Besides BVS, this charge distribution is consistent with the magnetic moments from DFT ( $1.78 \mu_B$  for V1,  $1.3-1.5 \mu_B$  for V2\_1-V2\_2 and  $0.99 \mu_B$  for V2\_3) and can explain qualitatively the nature of magnetic order in the  $ab$  plane. Empty orbitals favour ferromagnetic direct- (intra-trimer) or super- (inter-trimer) exchanges between adjacent sites in a  $V^{4+}-V^{3+}-V^{4+}$  zig-zag short-long ferromagnetic chains as shown by red ( $\uparrow$ ) and blue ( $\downarrow$ ) stripes on Figure 3d, in accordance with Goodenough-Kanamori-Anderson exchange rules or the Kugel-Khomskii orbital scheme. The AFM couplings around the remaining V2 spins in between the stripes are frustrated and minimized by a perpendicular alignment to the other spins.

### Synchrotron diffraction.

$GaV_4O_8$  was measured at ALBA Synchrotron in Barcelona, Spain at the BL04-MSPD beamline with a  $\lambda = 0.413 \text{ \AA}$  wavelength and in a 3 mm capillary and cooled down with a Dyanflow liquid He cryostat (a spurious reflection is seen and marked with an asterisk below). SXRD refinements at low temperatures were done with a mode approach, only values larger than  $3\sigma$  were allowed to vary.

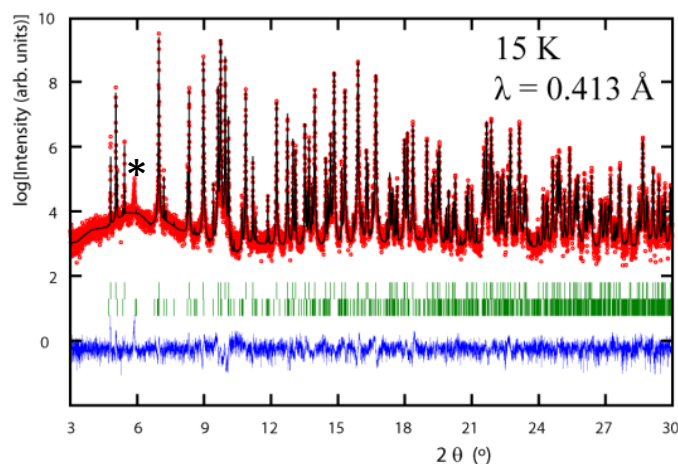

Supp. Fig. 8. SXRD Rietveld refinement for  $GaV_4O_8$  at 15 K. The asterisk refers to diffraction from the diffractometer.

Small single crystals were obtained via chemical vapour transport deposition. A small Ga doping in the V1 site was observed, possibly helping on the crystal growth.

Supp. Table 1. Crystal data and structure refinement.

| <b>Crystal data</b>                                                        |                                                       |
|----------------------------------------------------------------------------|-------------------------------------------------------|
| Chemical formula                                                           | Ga <sub>1.069</sub> V <sub>3.931</sub> O <sub>8</sub> |
| $M_r$                                                                      | 402.8                                                 |
| Crystal system, space group                                                | Hexagonal, $P6_3mc$                                   |
| Temperature (K)                                                            | 296                                                   |
| $a, c$ (Å)                                                                 | 5.696(4), 9.387(4)                                    |
| $V$ (Å <sup>3</sup> )                                                      | 263.8 (3)                                             |
| $Z$                                                                        | 2                                                     |
| Radiation type                                                             | Ag $K\alpha$ , $\lambda = 0.56086$ Å                  |
| $\mu$ (mm <sup>-1</sup> )                                                  | 6.253                                                 |
| Crystal size (mm)                                                          | 0.05 × 0.05 × 0.05                                    |
| <b>Data collection</b>                                                     |                                                       |
| Diffractometer                                                             | Apex                                                  |
| Absorption correction                                                      | Multi-scan “SADABS (Bruker, 2000)”                    |
| $T_{\min}, T_{\max}$                                                       | 0.6744, 0.7450                                        |
| No. of measured, independent and observed [ $I > 3\sigma(I)$ ] reflections | 2477, 199, 186                                        |
| $R_{\text{int}}$                                                           | 0.087                                                 |
| <b>Refinement</b>                                                          |                                                       |
| $R[F^2 > 2\sigma(F^2)], wR(F^2), S$                                        | 0.024, 0.048, 1.18                                    |
| No. of reflections                                                         | 361                                                   |
| No. of parameters                                                          | 24                                                    |
| $\Delta\rho_{\max}, \Delta\rho_{\min}$ (e Å <sup>-3</sup> )                | 0.83, -0.95                                           |
| Absolute structure                                                         | 168 of Friedel pairs used in the refinement           |
| Absolute structure parameter                                               | 0.05 (5)                                              |



Supp. Table 2. Atomic coordinates and equivalent isotropic displacement parameters

| Site                      | x          | y         | z         | U <sub>iso</sub> (eq) Å <sup>2</sup> | Occupancy                    |
|---------------------------|------------|-----------|-----------|--------------------------------------|------------------------------|
| <b>Ga(2b)<sup>a</sup></b> | 1/3        | 2/3       | 0.9464    | 0.0025(3)                            | 1                            |
| <b>V1(2b)</b>             | 1/3        | 2/3       | 0.5239(1) | 0.0013(5)                            | 0.93(1)/0.07(1) <sup>b</sup> |
| <b>V2(26c)</b>            | 0.14833(7) | 0.8167(7) | 0.2498(1) | 0.0026(2)                            | 1                            |
| <b>O1(6c)</b>             | 0          | 0         | 0.3818(7) | 0.006(1) <sup>c</sup>                | 1                            |
| <b>O2(2a)</b>             | 1/3        | 2/3       | 0.1429(7) | 0.004(1) <sup>c</sup>                | 1                            |
| <b>O3(6c)</b>             | 0.4887(4)  | 0.5113(4) | 0.3794(4) | 0.0023(6) <sup>c</sup>               | 1                            |
| <b>O4(6c)</b>             | 0.1697(4)  | 0.803(4)  | 0.6409(5) | 0.0045(8) <sup>c</sup>               | 1                            |

<sup>a</sup> Taken as origin. <sup>b</sup> V/Ga, <sup>c</sup> Refined isotropic

Supp. Table 3. Bond lengths and angles.

| d <sub>&lt;M-O&gt;</sub> | (Å)      | <M-O-M>   | (deg)    |
|--------------------------|----------|-----------|----------|
| Ga1-O2                   | 1.845(7) | V2-O1-V2  | 82.8(3)  |
| Ga1-O3                   | 1.865(4) | Ga1-O2-V2 | 118.8(2) |
| V2-O1                    | 1.917(4) | V2-O2-V2  | 98.7(3)  |
| V2-O2                    | 2.083(3) | Ga1-O3-V1 | 118.8(2) |
| V2-O3                    | 2.089(4) | Ga1-O3-V2 | 118.4(1) |
| V2-O4                    | 1.882(4) | V1-O3-V2  | 99.4(1)  |
| V1-O3                    | 2.047(3) | V2-O3-V2  | 98.4(2)  |
| V1-O4                    | 1.952(3) | V1-O4-V2  | 136.0(1) |
| d <sub>&lt;M-M&gt;</sub> | (Å)      | V2-O4-V2  | 84.7(2)  |
| V2-V2                    | 3.161(3) |           |          |
| V1-V1                    | 5.696(5) |           |          |
| V1-V2                    | 3.154(2) |           |          |
| Ga-V1                    | 3.368(3) |           |          |
| Ga-V2                    | 3.398(1) |           |          |

Supp. Table 4. Anisotropic displacement parameters

| Site          | U <sub>11</sub> | U <sub>22</sub> | U <sub>33</sub> | U <sub>12</sub> | U <sub>13</sub> | U <sub>23</sub> |
|---------------|-----------------|-----------------|-----------------|-----------------|-----------------|-----------------|
| <b>Ga(2b)</b> | 0.0024(3)       | 0.0024(3)       | 0.0026(5)       | 0.0012(1)       | 0               | 0               |
| <b>V1(2b)</b> | 0.0006(6)       | 0.0006(6)       | 0.0027(8)       | 0.0003(3)       | 0               | 0               |
| <b>V2(6c)</b> | 0.0024(3)       | 0.0024(3)       | 0.0027(4)       | 0.0010(3)       | -0.0001(2)      | 0.0001(2)       |

Supp. Table 5. Atomic coordinates and selected V-V distances of GaV<sub>4</sub>O<sub>8</sub> from the Rietveld fit of 90 K SXR data. S.G. *P6<sub>3</sub>mc*,  $a = 5.68436(2)$  Å,  $c = 9.38271(4)$  Å.  $R_{\text{exp}} = 0.099$   $R_p = 0.113$ ,  $\chi^2 = 1.99$ .

| Site   | x          | y         | z          | Biso (Å <sup>2</sup> ) |
|--------|------------|-----------|------------|------------------------|
| Ga(2b) | 1/3        | 2/3       | 0.0596(9)  | 0.04(1) <sup>a</sup>   |
| V1(2b) | 2/3        | 1/3       | 0.1366(9)  | 0.04(1) <sup>a</sup>   |
| V2(6c) | 0.2964(2)  | 0.1482(1) | -0.1372(8) | 0.04(1) <sup>a</sup>   |
| O1(6c) | 0.5121(5)  | 1.024(1)  | -0.0066(9) | 0.2(4) <sup>b</sup>    |
| O2(6c) | -0.1695(4) | 0.1695(4) | 0.2528(9)  | 0.2(4) <sup>b</sup>    |
| O3(2b) | 1/3        | 2/3       | 0.255(1)   | 0.2(4) <sup>b</sup>    |
| O4(2a) | 0          | 0         | 0          | 0.2(4) <sup>b</sup>    |
| V2-V2  | 2.527(2) Å | V1-V2     | 3.15(1) Å  |                        |
| V2-V2  | 3.157(2) Å | V1-V2     | 3.552(7) Å |                        |

<sup>a</sup>, <sup>b</sup> constrained together.

Supp. Table 6. Atomic coordinates and selected V-V distances of GaV<sub>4</sub>O<sub>8</sub> from the Rietveld fit of 15 K SXR data. S.G. *Cmc2<sub>1</sub>*,  $a = 5.68256(5)$  Å,  $b = 9.8471(1)$  Å,  $c = 9.38353(4)$  Å.  $R_{\text{exp}} = 0.095$   $R_p = 0.113$ ,  $\chi^2 = 2.07$ .

| Site      | x          | y         | z          | Biso (Å <sup>2</sup> ) |
|-----------|------------|-----------|------------|------------------------|
| Ga1 (4a)  | 0          | 2/3       | 0.0595     | 0.06(1) <sup>a</sup>   |
| V1_1(4a)  | 0          | 2/3       | 0.6366     | 0.06(1) <sup>a</sup>   |
| V2_1(8b)  | 0.2210(6)  | 0.0737(2) | 0.3595(3)  | 0.06(1) <sup>a</sup>   |
| V2_3(4a)  | 0          | 0.1499(8) | 0.8692(6)  | 0.06(1) <sup>a</sup>   |
| O1_1(8b)  | 0.76807    | 0.25603   | -0.0067    | 0.1(5) <sup>b</sup>    |
| O1_2(4a)  | 0          | 0.51205   | 0.4933     | 0.1(5) <sup>b</sup>    |
| O2_1(8b)  | 0.254(1)   | 0.4181(5) | 0.250(1)   | 0.1(5) <sup>b</sup>    |
| O2_2(4a)  | 0          | 0.819(2)  | 0.758(2)   | 0.1(5) <sup>b</sup>    |
| O3_1(4a)  | 0          | 0.678(2)  | 0.2547     | 0.1(5) <sup>b</sup>    |
| O4_1(4a)  | 0          | 0         | 0          | 0.1(5) <sup>b</sup>    |
| V2_1-V2_1 | 2.512(7) Å | V1_1-V2_1 | 3.180(3) Å |                        |
| V2_1-V2_3 | 2.536(8) Å | V1_1-V2_3 | 3.092(7) Å |                        |
| V2_1-V2_3 | 3.151(8) Å | V1_1-V2_1 | 3.534(3) Å |                        |
|           |            | V1_1-V2_3 | 3.587(4) Å |                        |

<sup>a</sup>, <sup>b</sup> constrained together.

Supp. Table S7. GaV<sub>4</sub>O<sub>8</sub> magnetic structure refinement from D20 ( $\lambda = 2.41 \text{ \AA}$ ) at 1.5 K. Following ISODISTORT from the m $\Lambda$ 2 irrep obtained from  $P6_3mc$  space group and  $k = [\frac{1}{4} \frac{1}{4} 0]$  magnetic propagation vector with only one arm of the star.  $Pa_c$  magnetic space group (7.27) with  $a = 11.29037 \text{ \AA}$ ,  $b = 9.81738 \text{ \AA}$ ,  $c = 14.64098 \text{ \AA}$  and  $\beta = 140.3866^\circ$  ( $\{(2, 2, 0), (-1, 1, 0), (2, 2, 1)\}$  supercell).  $R_{mag} = 8.87 \%$ .

|       | x      | y      | z      | m <sub>x</sub> | m <sub>y</sub> | m <sub>z</sub> | m <sub>Tot</sub> ( $\mu_B$ ) |
|-------|--------|--------|--------|----------------|----------------|----------------|------------------------------|
| V1_1  | 0.6083 | 0.8333 | 0.3853 | 0              | -1.06(1)       | 0              | 1.06(1)                      |
| V1_2  | 0.8583 | 0.3333 | 0.3853 | 0              | -1.06(1)       | 0              | 1.06(1)                      |
| V2_1a | 0.6322 | 0.1482 | 0.6322 | 0              | -0.225(7)      | 0              | 0.225(7)                     |
| V2_1b | 0.8822 | 0.6482 | 0.6322 | 0              | 0.225(7)       | 0              | 0.225(7)                     |
| V2_2a | 0.2434 | 0.0741 | 0.1322 | 0.40(1)        | 0              | 0              | 0.40(1)                      |
| V2_2b | 0.4934 | 0.5741 | 0.1322 | 0              | -0.40(1)       | 0              | 0.40(1)                      |
| V2_3a | 0.5210 | 0.9259 | 0.6322 | 0              | -0.40(1)       | 0              | 0.40(1)                      |
| V2_3b | 0.7710 | 0.4259 | 0.6322 | -0.40(1)       | 0              | 0              | 0.40(1)                      |
